# Supplementary material for: Modelling point mass balance for the glaciers of the Central European Alps using machine learning techniques
Source: Copernicus journal article supplement (doi:10.5194/tc-17-2811-2023), 2023-07-13
Supplement: Supplementary file 1 [file tc-17-2811-2023-supplement.zip]

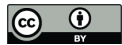

## *Supplement of*

# **Modelling point mass balance for the glaciers of the Central European Alps using machine learning techniques**

**Ritu Anilkumar et al.**

*Correspondence to:* Ritu Anilkumar ([ritu.anilkumar@nesac.gov.in](mailto:ritu.anilkumar@nesac.gov.in))

- tc-17-2811-2023-supplement-title-page.pdf
- pt-gmb-ml-main
  - LICENSE
  - README.md
  - feat\_imp
    - \* gbr\_perm\_imp.csv
    - \* lr\_perm\_imp.csv
    - \* nn\_perm\_imp.csv
    - \* rf\_perm\_imp.csv
    - \* svm\_perm\_imp.csv
  - hyp
    - \* gb\_grid.csv
    - \* nn\_grid.csv
    - \* rf\_grid.csv
    - \* svm\_grid.csv
  - main\_code
    - \* complete\_raw\_code.ipynb
    - \* testing\_predictions.csv
    - \* training\_predictions.csv
  - trained\_models.zip

The copyright of individual parts of the supplement might differ from the article licence.
